# Supplementary material
Source: PubMed Central journal article supplement (PMC5369729)

## \*Supplemental Material\*

### TABLES

Table S1. Cost (£) of health care for ulcerative colitis in the prior 3 months

|                                  | All patients<br>(N=173) |                                   |        |
|----------------------------------|-------------------------|-----------------------------------|--------|
|                                  | Mean (SD)               | Contribution to<br>total cost (%) | Median |
| Hospitalizations <sup>A</sup>    |                         |                                   |        |
| 1 day                            | 142 (223)               | 11.7                              | 0.00   |
| >1 day                           | 257 (1,049)             | 21.2                              | 0.00   |
| Current prescription medications | 336 (822)               | 27.7                              | 140.52 |
| Gastroenterologist consultations | 166 (109)               | 13.7                              | 137.00 |
| Nursing care                     | 29 (54)                 | 2.4                               | 0.00   |
| Other specialist consultations   | 17 (63)                 | 1.4                               | 0.00   |
| Other tests                      | 264 (355)               | 21.8                              | 148.00 |
| ED visits (without admission)    | 0 (4) <sup>B</sup>      | 0.0 <sup>C</sup>                  | 0.00   |
| Total UC costs                   | 1,211 (1,588)           | -                                 | 782.61 |

SD, standard deviation; IBD, inflammatory bowel disease; UC, ulcerative colitis; ED, emergency department

<sup>A</sup> Values were estimated by dividing 12-month costs by 4.

<sup>B</sup> Value was 0.46 before rounding.

<sup>C</sup> Value was greater than zero before rounding.

## LIST OF FIGURES

Figure S1. Health care provider visits for ulcerative colitis in the prior 12 months. Data from patient questionnaires.

Figure S2. Specialist consultations, nursing care, and other tests for ulcerative colitis in the prior 3 months. Data are from medical chart review.

Figure S3. Hospitalizations and emergency department visits for ulcerative colitis in the prior 12 months.

## FIGURES

Figure S1. Health care provider visits for ulcerative colitis in the prior 12 months. Data from patient questionnaires.

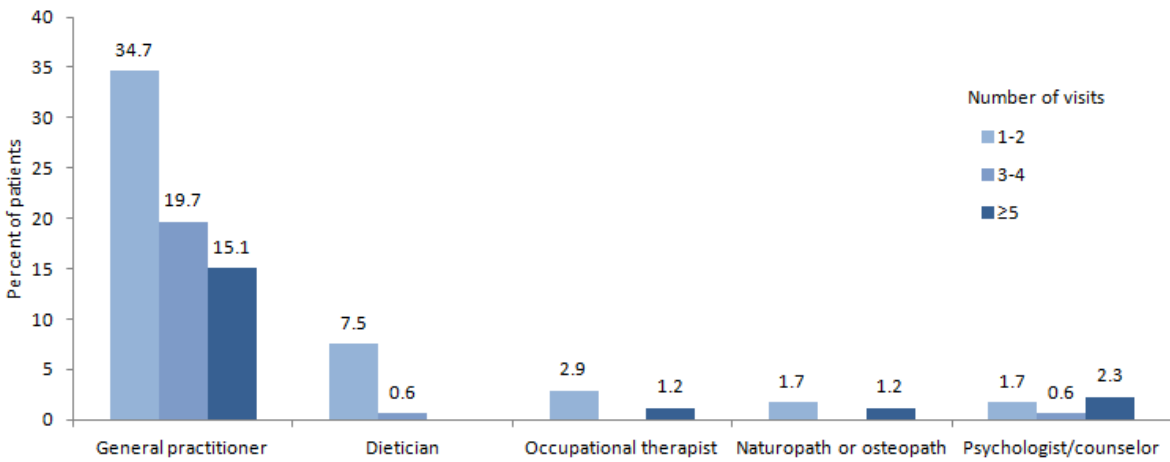

Figure S2. Specialist consultations, nursing care, and other tests for ulcerative colitis in the prior 3 months. Data are from medical chart review.

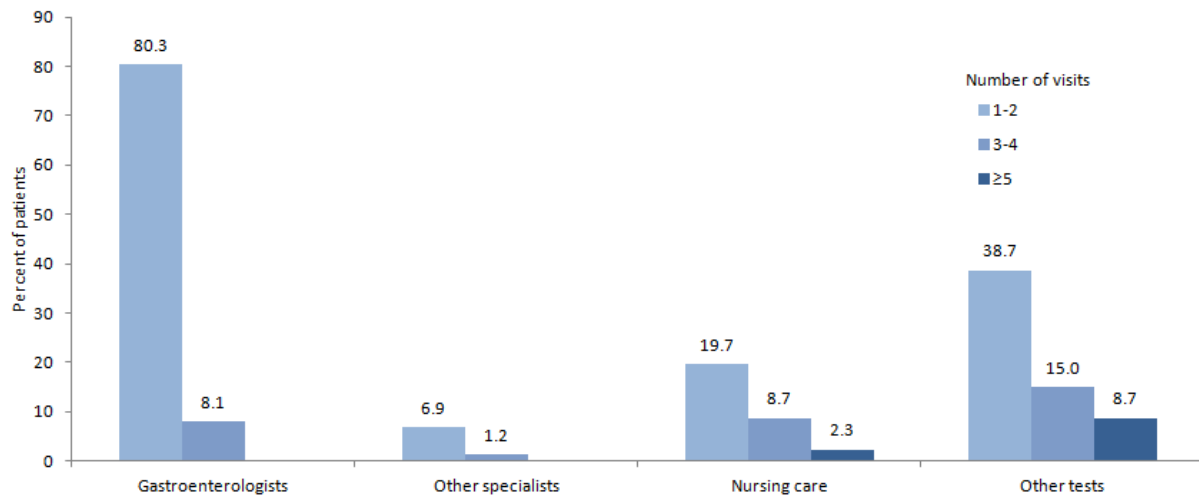

Figure S3. Hospitalizations and emergency department visits for ulcerative colitis in the prior 12 months.

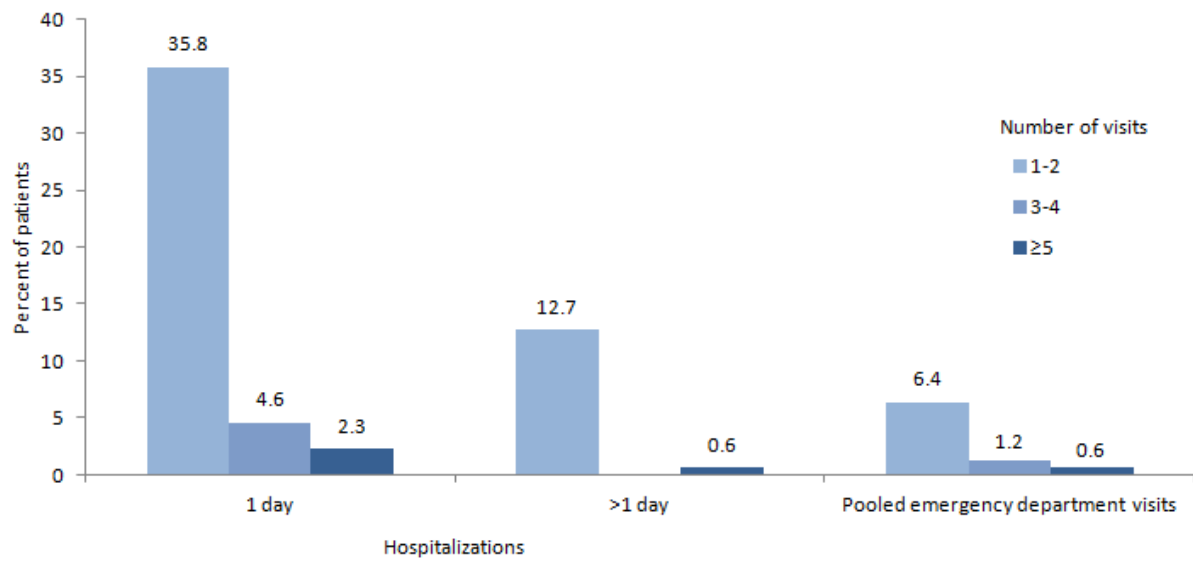

Supplement: flgastro-2013-100409-s1.pdf [file flgastro-2013-100409-s1.pdf]
